# Supplementary material for: High Levels of Zinc Affect Nitrogen and Phosphorus Transformation in Rice Rhizosphere Soil by Modifying Microbial Communities
Source: MDPI journal article supplement (doi:10.3390/plants11172271), 2022-08-31
Supplement: s1 [file s1]

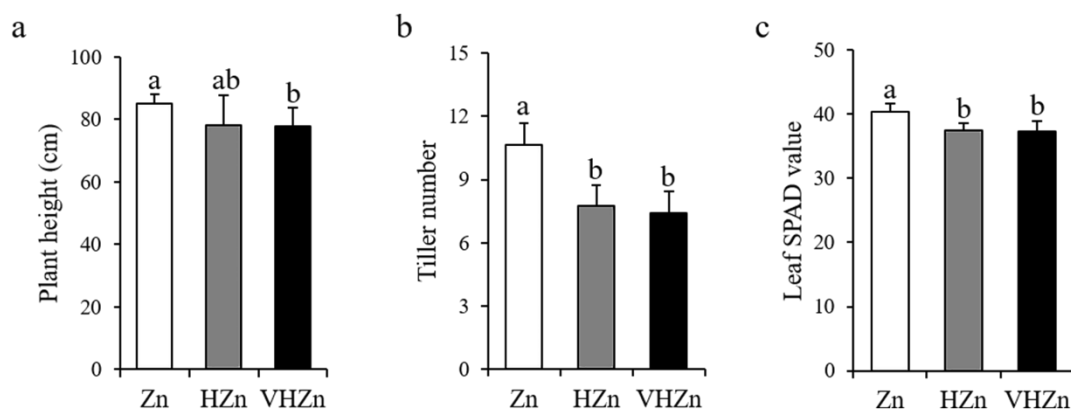

**Supplementary Figure S1** Plant height (a), tiller number (b), and leaf SPAD value (c) of rice plant grown in soil with different levels of Zn (Zn: 10 mg/kg soil; HZn: 200 mg/kg soil; VHZn: 400 mg/kg soil). Data are means  $\pm$ SD of three biological replicates. Different letters indicate significant difference at  $P < 0.05$  by Tukey's test.

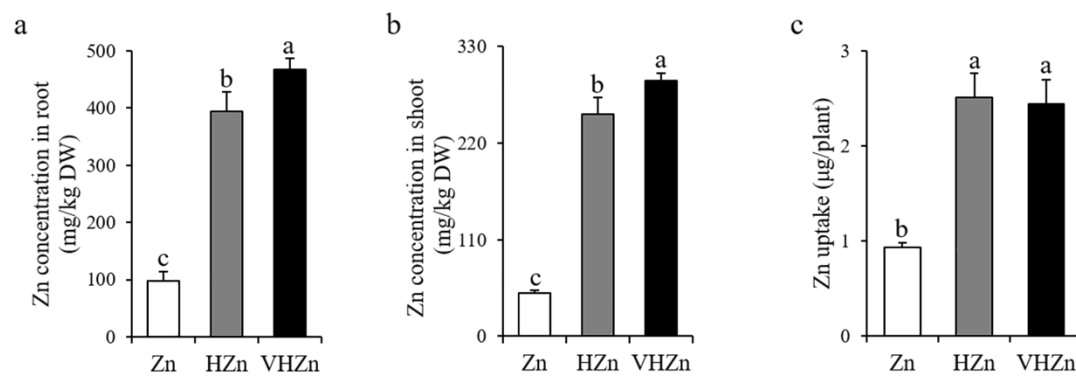

**Supplementary Figure S2** Zn concentrations in root and shoot (a, b), and Zn uptake (c) of rice plant grown in soil with different levels of Zn (Zn: 10 mg/kg soil; HZn: 200 mg/kg soil; VHZN: 400 mg/kg soil). Data are means  $\pm$ SD of three biological replicates. Different letters indicate significant difference at  $P < 0.05$  by Tukey's test.

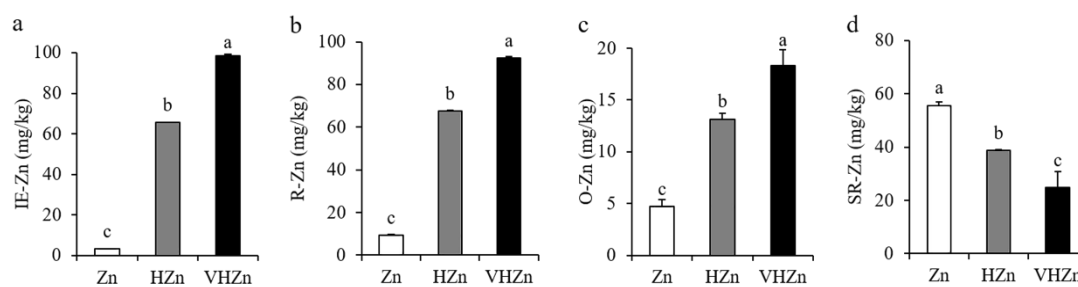

**Supplementary Figure S3** Concentrations of different Zn forms (a, IE-Zn, acid extraction zinc; b, R-Zn, reducible zinc; c, O-Zn, oxidizable zinc; d, SR-Zn, solid residue zinc) in rice rhizosphere soil with different levels of Zn (Zn: 10 mg/kg soil; HZn: 200 mg/kg soil; VHZN: 400 mg/kg soil). Data are means  $\pm$ SD of three biological replicates. Different letters indicate significant difference at  $P < 0.05$  by Tukey's test.

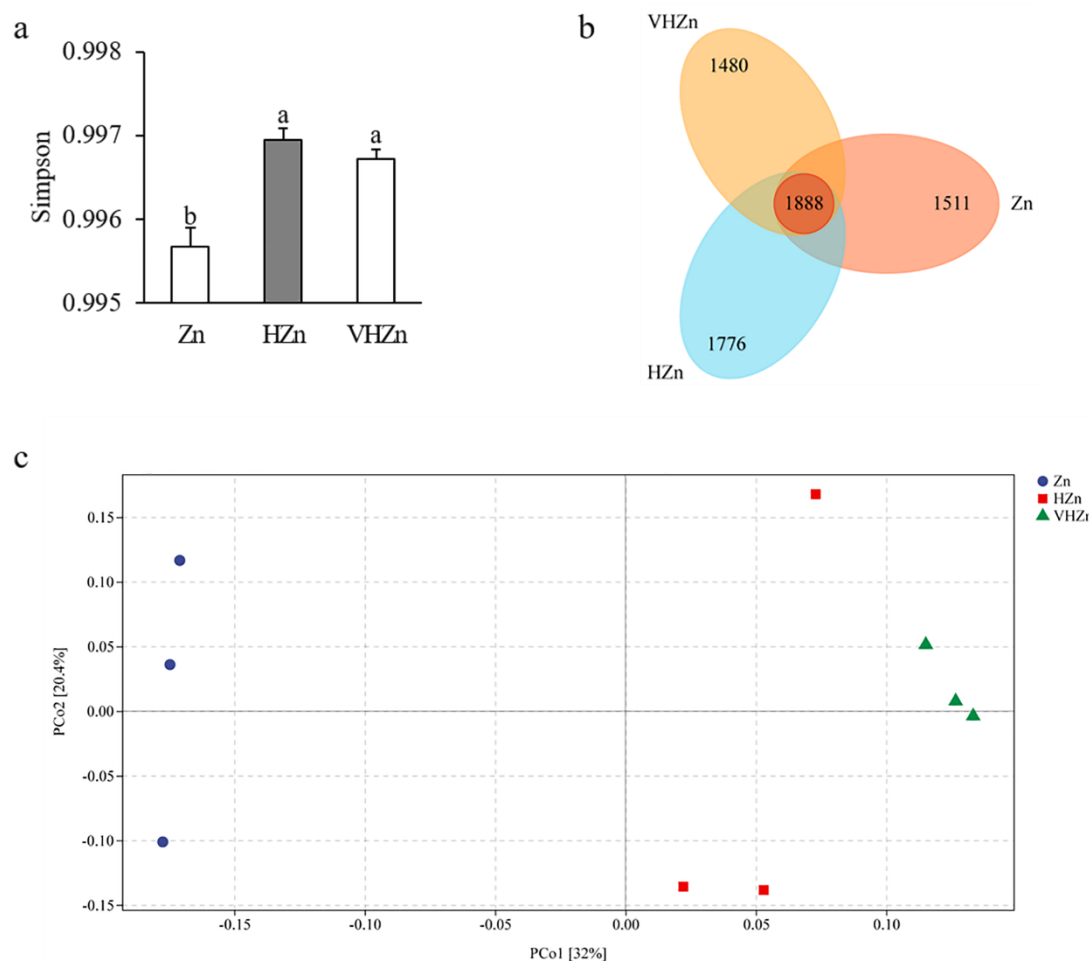

**Supplementary Figure S4** Simpson index (a), Venn diagram (b), and principal coordinate analysis (PCoA, c) of bacterial communities in rice rhizosphere soil with different levels of Zn (Zn: 10 mg/kg soil; HZn: 200 mg/kg soil; VHZn: 400 mg/kg soil). Data are means  $\pm$ SD of three biological replicates. Different letters indicate significant difference at  $P < 0.05$  by Tukey's test.

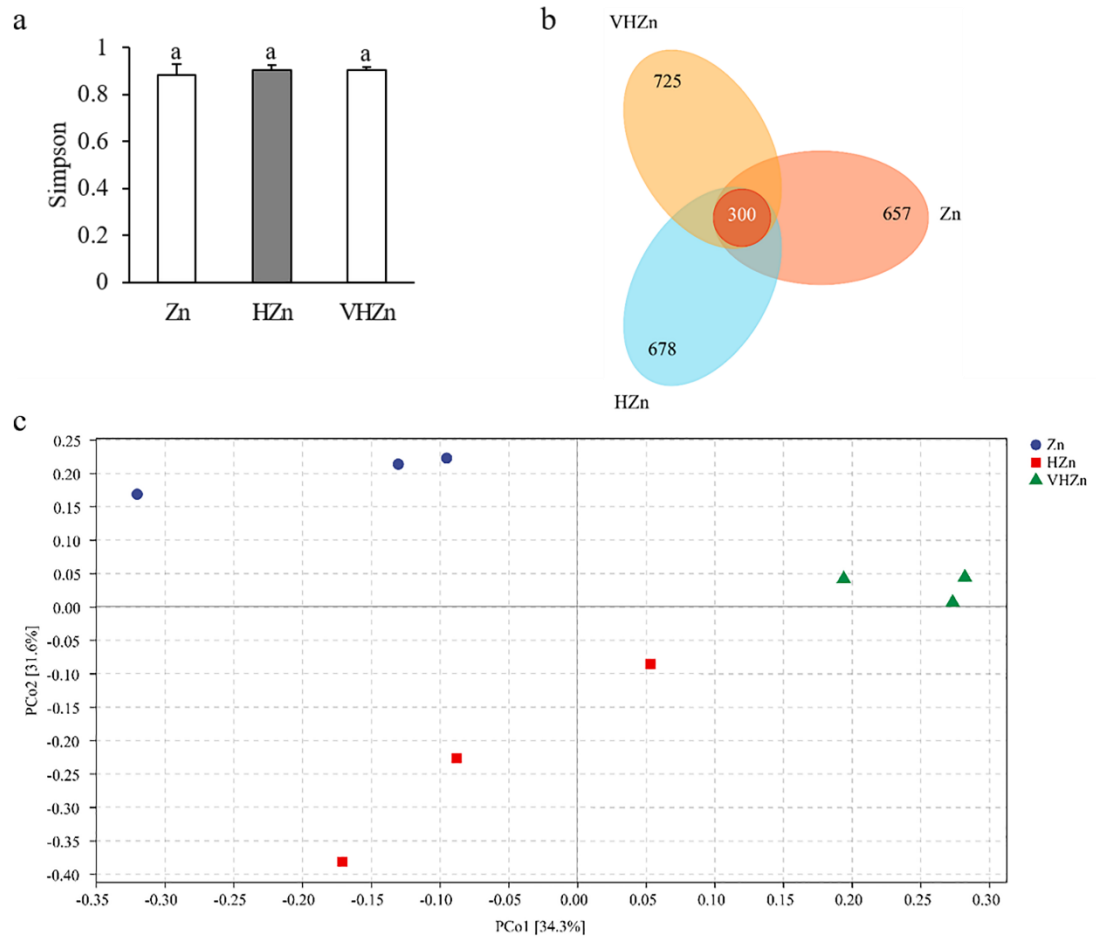

**Supplementary Figure S5** Simpson index (a), Venn diagram (b), and PCo analysis (c, principal coordinate analysis) of fungal communities in rice rhizosphere soil with different levels of Zn (Zn: 10 mg/kg soil; HZn: 200 mg/kg soil; VHZn: 400 mg/kg soil). Data are means  $\pm$ SD of three biological replicates. Different letters indicate significant difference at  $P < 0.05$  by Tukey's test.
